# Supplementary material for: Rare Human Diseases: Model Organisms in Deciphering the Molecular Basis of Primary Ciliary Dyskinesia
Source: PubMed Central journal article supplement (PMC6952885; doi:10.3390/cells8121614), 2019-12-11
Supplement: cells-08-01614-s001.pdf [file cells-08-01614-s001.pdf]

**Table S1**

Genes associated with primary ciliary dyskinesia

| Gene name         |                    |                                  |         |                                                    | Comments                                                                    |
|-------------------|--------------------|----------------------------------|---------|----------------------------------------------------|-----------------------------------------------------------------------------|
| <i>H. sapiens</i> | <i>M. musculus</i> | <i>D. rerio</i>                  | Aliases | <i>C.reinhardtii</i><br>(mutant strain)<br>protein |                                                                             |
| MCIDAS            | <i>Mcidas</i>      | <i>mcidas</i>                    |         | ----                                               | transcription co-regulator                                                  |
| CCNO              | <i>Ccno</i>        | <i>cyclin O</i>                  |         | ----                                               | cytoplasmic protein; controls amplification of centrioles                   |
| CCDC39            | <i>Ccdc39</i>      | <i>ccdc39</i>                    | CFAP59  | <i>FAP59</i><br>( <i>pf8</i> )<br>FAP59            | likely defines 96-nm axonemal unit and docking site for N-DRC, IDAs and RSs |
| CCDC40            | <i>Ccdc40</i>      | <i>ccdc40</i>                    | CFAP172 | <i>FAP172</i><br>( <i>pf7</i> )<br>FAP172          | likely defines 96-nm axonemal unit and docking site for N-DRC, IDAs and RSs |
| DNAH5             | <i>Dnah5</i>       | <i>dnah5</i>                     |         | ODA2<br>( <i>pf28</i> )<br>HC1 $\gamma$            | ODAs<br>$\gamma$ dynein heavy chain                                         |
| DNAH9             | <i>Dnah9</i>       | <i>dnah9</i>                     |         | ODA4<br>( <i>oda4</i> )<br>HC1 $\beta$             | ODAs<br>$\beta$ - dynein heavy chain                                        |
| DNAH11            | <i>Dnah11</i>      | LOC567790                        |         | ODA4<br>( <i>oda4</i> )<br>HC1 $\beta$             | ODAs<br>$\beta$ - dynein heavy chain                                        |
| DNAI1             | <i>Dnai1</i>       | <i>dnai1.1</i><br><i>dnai1.2</i> |         | ODA9, DIC1<br>( <i>oda9</i> )<br>IC78, IC80        | ODAs<br>intermediate chain                                                  |
| DNAI2             | <i>Dnai2</i>       | <i>dnai2a</i><br><i>dnai2b</i>   |         | ODA6, DIC2<br>( <i>oda6</i> )<br>IC69, IC70        | ODAs<br>intermediate chain                                                  |
| DNAL1             | <i>Dnal1</i>       | <i>dnal1</i>                     |         | DLC1, DLU1<br>LC1                                  | ODAs<br>light chain                                                         |
| NME8              | <i>Nme8</i>        | <i>nme8</i>                      | TXNDC3  | DLC3, DLX1<br>LC3<br>DLC5, DLX2<br>LC5             | ODAs<br>light chain                                                         |
| CCDC114           | <i>Ccdc114</i>     | <i>ccdc114</i>                   |         | DCC2, ODA1<br>( <i>oda1</i> )<br>ODA-DC2           | ODA docking complex                                                         |
| CCDC151           | <i>Ccdc151</i>     | <i>ccdc151</i>                   |         | ODA10<br>( <i>oda10</i> )<br>ODA10                 | ODA docking complex                                                         |
| TTC25             | <i>Ttc25</i>       | <i>ttc25</i>                     |         | ----                                               | ODA docking complex                                                         |
| ARMC4             | <i>Armc4</i>       | <i>armc4</i>                     |         | ----                                               | ODA docking complex                                                         |
| MNS1              | <i>Mns1</i>        | <i>mns1</i>                      |         | FAP127<br>FAP127                                   | Possibly ODA docking complex                                                |
| CCDC103           | <i>Ccdc103</i>     | <i>ccdc103</i>                   | ----    | PR46b, CCDC103<br>CCDC103                          | Possibly ODA docking complex                                                |
| DNAAF1            | <i>Dnaaf1</i>      | <i>dnaaf1</i>                    | LRRC50  | ODA7, DAU1<br>( <i>oda7</i> )<br>ODA7              | Cytoplasmic                                                                 |

|                |                |                                |                                                  |                                                       |                   |
|----------------|----------------|--------------------------------|--------------------------------------------------|-------------------------------------------------------|-------------------|
| <i>DNAAF2</i>  | <i>Dnaaf2</i>  | <i>dnaaf2</i>                  | <i>KTU</i><br><i>Kintoun</i><br><i>C14orf104</i> | <i>DAP1, MOT45</i><br><i>(pf13, mot45)</i><br>PF13    | Cytoplasmic       |
| <i>DNAAF3</i>  | <i>Dnaaf3</i>  | <i>dnaaf3</i>                  | <i>C19orf51</i>                                  | <i>DAB1, PF22</i><br><i>(pf22)</i><br>PF22            | Cytoplasmic       |
| <i>DNAAF4</i>  | <i>Dnaaf4</i>  | <i>dnaaf4</i>                  | <i>DYX1C1</i>                                    | <i>PF23</i><br><i>(pf23)</i><br>DYX1C1                | Cytoplasmic       |
| <i>DNAAF5</i>  | <i>Dnaaf5</i>  | <i>dnaaf5</i>                  | <i>HEATR2</i>                                    | <i>HEATR2</i><br><i>CHLRE_</i><br><i>09g395500v5</i>  | Cytoplasmic       |
| <i>PIH1D3</i>  | <i>Pih1d3</i>  | <i>pih1d3</i>                  | <i>Twister</i>                                   | <i>TW11</i><br><i>(twi1)</i><br>PIH1D3                | Cytoplasmic       |
| <i>ZMYND10</i> | <i>Zmynd10</i> | <i>zmynd10</i>                 |                                                  | <i>ZMYND10</i><br><i>CHLRE_</i><br><i>08g358751v5</i> | Cytoplasmic       |
| <i>SPAG1</i>   | <i>Spag1</i>   | <i>spag1a</i><br><i>spag1b</i> |                                                  | ----                                                  | Cytoplasmic       |
| <i>CFAP298</i> | <i>Cfap298</i> | <i>cfap298</i>                 | <i>C21orf59</i><br><i>kurly</i>                  | <i>FBB18, DAB2</i><br>CFAP298                         | Cytoplasmic       |
| <i>LRRC6</i>   | <i>Lrrc6</i>   | <i>lrrc6</i>                   | <i>Seahorse</i>                                  | <i>MOT47</i><br><i>(mot47)</i><br>MOT47               | Cytoplasmic       |
| <i>CFAP300</i> | <i>Cfap300</i> | <i>cfap300</i>                 | <i>C11orf70</i>                                  | <i>FBB5</i><br>FAP300                                 | Cytoplasmic       |
| <i>DRC1</i>    | <i>Drc1</i>    | <i>drc1</i>                    | <i>CCDC164</i>                                   | <i>DRC1, PF3</i><br><i>(pf3)</i><br>DRC1              | nexin link        |
| <i>CCDC65</i>  | <i>Ccdc65</i>  | <i>ccdc65</i>                  | <i>DRC2</i><br><i>CFAP250</i>                    | <i>DRC2</i><br>FAP250                                 | nexin link        |
| <i>GAS8</i>    | <i>Gas8</i>    | <i>gas8</i>                    | <i>DRC4</i><br><i>GAS11</i>                      | <i>DRC4, PF2</i><br><i>(pf2)</i><br>DRC4              | nexin link        |
| <i>RSPH1</i>   | <i>Rsph1</i>   | <i>rsph1</i>                   |                                                  | <i>RSP1</i><br>RSP1                                   | radial spoke head |
| <i>RSPH4A</i>  | <i>Rsph4a</i>  | <i>rsph4a</i>                  |                                                  | <i>RSP4</i><br><i>(pf1)</i><br>RSP4A                  | radial spoke head |
| <i>RSPH9</i>   | <i>Rsph9</i>   | <i>rsph9</i>                   |                                                  | <i>RSP9</i><br><i>(pf17)</i><br>RSP9                  | radial spoke head |
| <i>RSPH3</i>   | <i>Rsph3</i>   | <i>rsph3</i>                   |                                                  | <i>RSP3</i><br><i>(pf14)</i><br>RSP3                  | radial spoke stem |
| <i>DNAJB13</i> | <i>Dnajb13</i> | <i>dnajb13</i>                 |                                                  | <i>RSP16, HSP40</i><br><i>(pf33)</i><br>RSP16         | radial spoke neck |
| <i>HYDIN</i>   | <i>Hydin</i>   | <i>hydin</i>                   |                                                  | <i>HYDIN</i><br>HYDIN                                 | central apparatus |

|         |                |                                |  |                                                      |                                                                         |
|---------|----------------|--------------------------------|--|------------------------------------------------------|-------------------------------------------------------------------------|
| STK36   | <i>Stk36</i>   | <i>stk36</i>                   |  | CHLREDRAFT_104702                                    | central apparatus<br>Limited similarity to <i>Chlamydomonas</i> protein |
| SPEF2   | <i>Spef2</i>   | <i>spef2</i>                   |  | CPC1<br>( <i>cpc1</i> )<br>CPC1                      | central apparatus                                                       |
| CFAP221 | <i>Cfap221</i> | ----                           |  | FAP221<br>FAP221, PCDP1                              | central apparatus                                                       |
| RPGR    | <i>Rpgr</i>    | <i>rpgra</i> ,<br><i>rpgra</i> |  | ----                                                 | possibly transition zone region                                         |
| OFD1    | <i>Ofd1</i>    | <i>ofd1</i>                    |  | OFD1<br>OFD1                                         | basal foot of the basal body                                            |
| GAS2L2  | <i>Gas2l2</i>  | <i>gas2l2</i>                  |  | ----                                                 | near basal bodies                                                       |
| TEKT1   | <i>Tekt1</i>   | <i>tekt1</i>                   |  | ----                                                 | centrosome, basal bodies,<br>axoneme                                    |
| LRRC56  | <i>Lrrc56</i>  | <i>lrrc56</i>                  |  | ODA8, DLU2<br>( <i>oda8</i> , <i>mot37</i> )<br>ODA8 | Unknown<br>Limited similarity to <i>Chlamydomonas</i> protein           |
